# Supplementary material for: GAS6 ameliorates advanced age-associated meiotic defects in mouse oocytes by modulating mitochondrial function
Source: publisher site journal article supplement (doi:10.18632/aging.203328), 2021-07-26
Supplement: Supplementary file [file aging-v13i14-203328-supplementary-material-SD1.pdf]

## SUPPLEMENTARY TABLE

**Supplementary Table 1. Primer sequences and RT-PCR conditions.**

| <b>Gene symbol</b> | <b>Gene name</b>                                                      | <b>Accession number</b> | <b>Primer sequences<sup>a</sup></b>                      |
|--------------------|-----------------------------------------------------------------------|-------------------------|----------------------------------------------------------|
| <i>Gas6</i>        | Growth arrest-specific 6                                              | NM_019521.2             | For-AAAGGGCCAGAGTGAAGTGA<br>Rev-TTTTCCCGTTTACCTCCAGA     |
| <i>Mtstp6</i>      | Mitochondrially encoded ATP synthase membrane subunit 6               | NC_005089.1             | For-ACAGGCTTCCGACACAAACT<br>Rev-GTAGCTGTTGGTGGGCTAAT     |
| <i>Mtnd1</i>       | Mitochondrially encoded NADH dehydrogenase 6                          | NC_005089.1             | For-TCGACCTGACAGAAGGAGAA<br>Rev-GATGCTCGGATCCATAGGAA     |
| <i>Hlfoo</i>       | H1 histone family, member O, oocyte-specific                          | NM_138311               | For-GCGAAACCGAAAGAGGTCAGAA<br>Rev-TGGAGGAGGTCTTGGGAAGTAA |
| <i>Mtnd1</i>       | Mitochondrially Encoded NADH:ubiquinone oxidoreductase core subunit 1 | NC_005089.1             | For-CAATACGCCCTTTAACAACC<br>Rev-TTTGGAGTTGAGGCTCATC      |

<sup>a</sup>For, Forward; Rev, Reverse.
